# Supplementary material for: Enzymes in the glutamate-glutamine cycle in the anterior cingulate cortex in postmortem brain of subjects with autism
Source: PubMed Central journal article supplement (PMC3621600; doi:10.1186/2040-2392-4-6), 2013-03-26

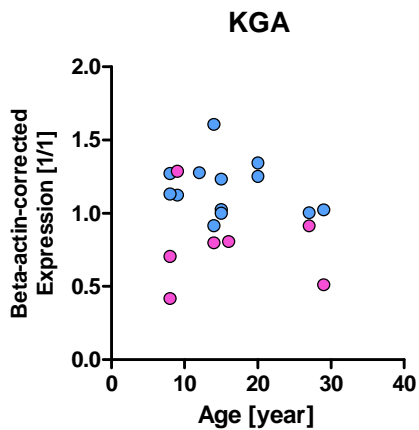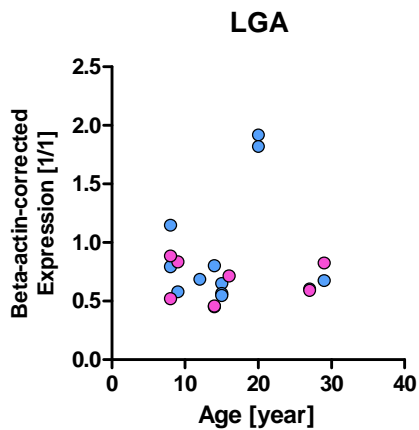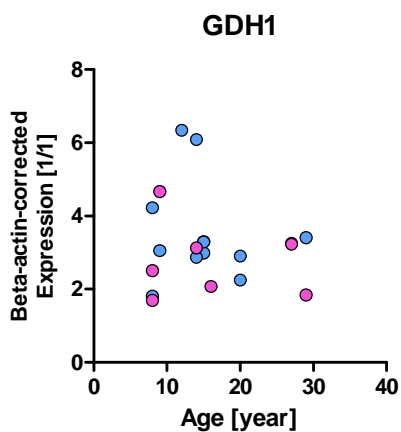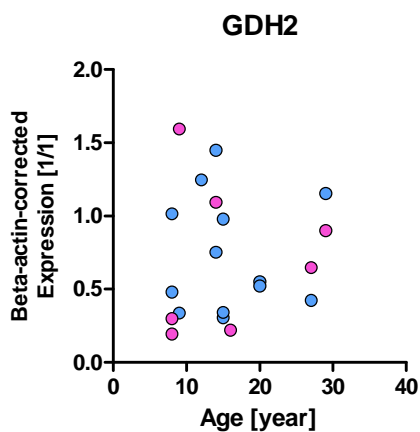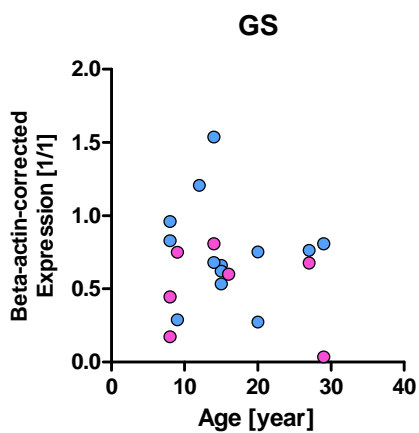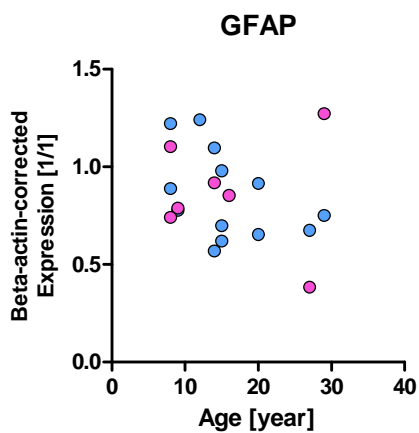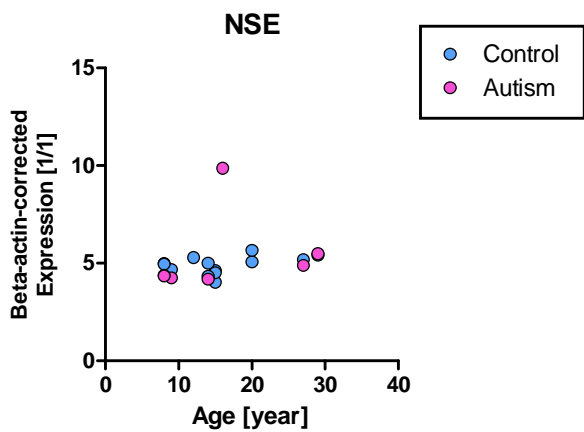

Supplement: 2040-2392-4-6-S1.pdf [file 2040-2392-4-6-S1.pdf]
